# Supplementary material for: How Can We Increase the Nutrition-Related Knowledge in Children Aged 7–12 Years: Results of Focus Groups Interviews with Parents—Junior-Edu-Żywienie (JEŻ) Project
Source: MDPI journal article supplement (doi:10.3390/nu16010129), 2023-12-30
Supplement: s1 [file s1]

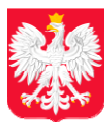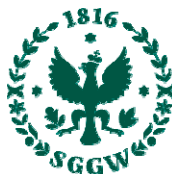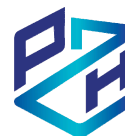

**"FOCUS GROUP INTERVIEW SCRIPT AMONG  
PARENTS of PRIMARY SCHOOL CHILDREN AGED 7-9 YEARS OLD  
(and AGED 10-12 YEARS OLD)"**

**Participants of the interview:** 6-8 parents of primary school children aged 7-10 years old (aged 10-12 years)

**FGI duration:** 90 minut

|                                                                                                                                                                                                                                                                                                                                                                                                                                                                                                                                                                                                                                                                                                                                                                                                                                                                                                                  |
|------------------------------------------------------------------------------------------------------------------------------------------------------------------------------------------------------------------------------------------------------------------------------------------------------------------------------------------------------------------------------------------------------------------------------------------------------------------------------------------------------------------------------------------------------------------------------------------------------------------------------------------------------------------------------------------------------------------------------------------------------------------------------------------------------------------------------------------------------------------------------------------------------------------|
| <b>1. Introduction to the group discussion (5 minutes)</b>                                                                                                                                                                                                                                                                                                                                                                                                                                                                                                                                                                                                                                                                                                                                                                                                                                                       |
| <ul style="list-style-type: none"><li>• Moderator's introduction</li><li>• Presentation of the research purpose and the purpose of conducting the group interview</li><li>• Explanation of the rules for conducting the group interview</li><li>• Explanation that the focus group interview will be recorded, and the recorded content is confidential and will be used for research purposes</li><li>• Asking participants if they have any questions - moderator's responses and clarification of any doubts</li><li>• Informing about the duration of the meeting: up to 1.5 hours</li></ul>                                                                                                                                                                                                                                                                                                                 |
| <b>2. Evaluating parents of children's approach to nutrition (5 – 10 minutes)</b>                                                                                                                                                                                                                                                                                                                                                                                                                                                                                                                                                                                                                                                                                                                                                                                                                                |
| <p>How important is the topic of proper nutrition, diet, valuable products, etc. in your homes/families? We wait for a spontaneous answer and then ask:</p> <ul style="list-style-type: none"><li>• do you like these topics? Are you happy to discuss them?</li><li>• How important do you think they are?</li><li>• How often do you talk to your children about these topics?</li><li>• Are children interested in these topics?</li><li>• From your point of view, are these topics easy?</li></ul> <p><i>The moderator can ask the following questions in each topic:</i></p> <ul style="list-style-type: none"><li>- Why yes / no?</li><li>- What is the reason for this?</li></ul>                                                                                                                                                                                                                        |
| <b>3. The current state of nutritional education for children in the opinion of parents (15-20 minutes)</b>                                                                                                                                                                                                                                                                                                                                                                                                                                                                                                                                                                                                                                                                                                                                                                                                      |
| <p>How do you assess the nutritional knowledge level of your children (grades 1-6) in terms of:</p> <ul style="list-style-type: none"><li>• rules of proper nutrition?</li><li>• food products?</li><li>• methods of food production?</li></ul> <p><i>The moderator can ask the following questions in each topic:</i></p> <ul style="list-style-type: none"><li>• why do you think so?</li><li>• what does your answer mean?</li><li>• What information do children particularly lack in this area?</li></ul> <p>Are these topics important from your point of view?</p> <ul style="list-style-type: none"><li>- why do you think so?</li><li>- what does your answer result from?</li></ul> <p>Do you think that current curricula include content related to:</p> <ul style="list-style-type: none"><li>- rules of proper nutrition?</li><li>- food products?</li><li>- methods of food production?</li></ul> |

*The task entitled 'Conducting scientific research in the field of nutrition of children and adolescents, developing and implementing a nutritional education program for pupils of grades 1-6 of primary schools. Acronym: Junior-Edu-Żywnienie (JEŻ)'. The study was financially supported by the Polish Ministry of Education and Science (MEiN/2022/DPI/96 of March 7, 2022).*



If so, in which classes are these topics most often discussed?

Do you think that food and nutrition topics should be included in teaching curricula?

- Why yes / no? why do you think so?
- What benefits do you see from discussing such topics at school?
- What weak points do you notice when discussing such topics at school?
- What specific areas related to nutrition do you think should be included in school curricula?
- What knowledge does your children lack? What problems do you struggle with your child's diet and nutrition?

*The moderator collects spontaneous answers, and if they do not appear, we also ask about:*

- sweets, sugar, sweetened drinks
- energy drinks
- dairy products
- whole grain cereal products
- daily intake of vegetables and fruits
- optimal number of meals per day
- optimal time to eat meals during the day
- portion size and proportion of ingredients/ product groups
- liquid intake during the day
- fast food
- salted snacks
- physical activity
- nutrients, sources and roles of: fats, calcium, vitamins, fiber, protein, etc.
- vegan diet

*The moderator asks briefly:*

- How important is this topic for you? What it comes from?
- Why is this topic problematic in your home/ in your children's nutrition?
- Which aspects are particularly important and therefore there should be more education about them?

#### **4. Sources of information among students from the perspective of parents (10-15 minutes)**

- Where do children get knowledge about topics that interest them? (we ask generally to identify the sources most relevant to them)
  - channels of famous youtubers: what specific names?
  - Influencers: jakie konkretne osoby/ nazwiska/ pseudonimy?
  - Facebook, Instagram: what specific profiles?
  - Tik-tok: what specific profiles?
  - blogs: what specific names?
  - peers
  - open and closed groups on social media: what topics and main thread?
  - youth press: what titles?
  - books and guides: what titles?
  - teachers
  - parents
  - TV programs: what specific names?



|                                                                                                                                                                                                                                                                                                                                                                                                                                                                                                                                                                                                                                                                                                                                                                                                                                                                                                                                                                                                                                      |
|--------------------------------------------------------------------------------------------------------------------------------------------------------------------------------------------------------------------------------------------------------------------------------------------------------------------------------------------------------------------------------------------------------------------------------------------------------------------------------------------------------------------------------------------------------------------------------------------------------------------------------------------------------------------------------------------------------------------------------------------------------------------------------------------------------------------------------------------------------------------------------------------------------------------------------------------------------------------------------------------------------------------------------------|
| <ul style="list-style-type: none"><li>• What is the role of social media, influencers, youtubers and bloggers in students' acquisition of nutritional knowledge?<ul style="list-style-type: none"><li>- Do you think it can also be an important source of knowledge also in the field of nutrition? Why is this possible or impossible?</li><li>- What conditions would have to be met for these to be important sources of knowledge? Interesting content, appropriate intensity, attractive graphics?</li></ul></li></ul>                                                                                                                                                                                                                                                                                                                                                                                                                                                                                                         |
| <b>5. The scope and implementation of nutritional education for children in the opinion of parents (10-15 minutes)</b>                                                                                                                                                                                                                                                                                                                                                                                                                                                                                                                                                                                                                                                                                                                                                                                                                                                                                                               |
| <ul style="list-style-type: none"><li>• What do you think nutritional education for children at school should look like?<ul style="list-style-type: none"><li>- a separate teaching subject</li><li>- talks during educational classes with class teacher</li><li>- extra teaching hours</li><li>- meeting with specialists: dietitians, doctors, athletes, etc.</li></ul></li><li>• How long do you think nutritional education should be continued at school? (a few hours a year, a whole semester, several years)?</li><li>• Should nutritional education at school be differentiated depending on the age of children? What age groups do you propose to divide students into? What it comes from?</li><li>• Should classes be only theoretical or should they also include practical classes? Which one for example? What should children learn during such classes?</li><li>• Who should be responsible for nutritional education at school? School director, class teacher, nurse, external institution, who else?</li></ul> |
| <b>6. Scope and implemetation of nutritional education for parents (5-10 minutes)</b>                                                                                                                                                                                                                                                                                                                                                                                                                                                                                                                                                                                                                                                                                                                                                                                                                                                                                                                                                |
| <ul style="list-style-type: none"><li>• Do you think that nutritional education for students' parents should be provided in primary school? If so, in what way (methods)? What form would be attractive to you?<ul style="list-style-type: none"><li>- meeting with specialists: dietitians, doctors, athletes, etc.</li><li>- cyclical lectures devoted to specific topics/problems</li><li>- theoretical and practical classes for parents and children (together)</li><li>- online form/offline</li><li>- printed materials: folders, books, brochures, research results, sample diets and nutritional patterns</li><li>- practical activities</li></ul></li></ul>                                                                                                                                                                                                                                                                                                                                                                |
| <b>7. Educational materials and parents' communication needs (10 minutes)</b>                                                                                                                                                                                                                                                                                                                                                                                                                                                                                                                                                                                                                                                                                                                                                                                                                                                                                                                                                        |
| <ul style="list-style-type: none"><li>• What is needed to implement nutritional education? For example, availability of materials for parents and children, that increase the level of knowledge? More pressure from the school/ Ministry of National Education/ Ministry of Health?</li><li>• What media should be used in children's nutritional education? (TV, radio, social media)</li><li>• What publications addressed to children should be prepared as part of nutritional education (books, guides, comics, etc.)?</li><li>• What form of educational materials is the most beneficial?<ul style="list-style-type: none"><li>- printed</li><li>- multimedia</li><li>- video films etc.</li></ul></li><li>• What additional teaching aids should be prepared for nutritional education to be effective? Do</li></ul>                                                                                                                                                                                                        |



you have any specific ideas?

- Should social media be used in nutritional education and how? Do you have any specific ideas?

#### 8. The pandemic and dietary habits (5 minutes)

- Do you still remember the times of the pandemic? Your children couldn't go to school, and education was distance, so you probably spent most of your time at home with children.
- What particularly changed in your life then?
- How did your daily routine change during that time? What changes occurred?"
- How did you feel?
- How did you spend your time?
- Did you engage in any additional activities?
- Do you feel that the whole family had more or less physical activity?
- Do you feel that you ate different foods or meals than usual during that time? What foods do you associate with that period?
- What types of foods did you eat more? Do you still eat those products? Why yes/no?
- What types of foods did you eat seldom?
- Do you feel that you are eating in the same way as during the pandemic?

#### 9. Summary of the group discussion (5 minutes)

- A brief summary of the discussion.
- Is there anything else anyone would like to add?
- Thank you for participating in interview.
